# Supplementary material for: Anverenes B–E, New Polyhalogenated Monoterpenes from the Antarctic Red Alga Plocamium cartilagineum
Source: PubMed Central journal article supplement (PMC6521118; doi:10.3390/md17040230), 2019-04-17
Supplement: marinedrugs-17-00230-s001.pdf [file marinedrugs-17-00230-s001.pdf]

Supplementary Information

## Anverenes B-E, New polyhalogenated monoterpenes from the Antarctic red alga *Plocamium cartilagineum*

Andrew J. Shilling <sup>1</sup>, Jacqueline L. von Salm <sup>1</sup>, Anthony R. Sanchez <sup>2</sup>, Younghoon Kee <sup>2</sup>, Charles D. Amsler <sup>3</sup>, James B. McClintock <sup>3</sup>, and Bill J. Baker <sup>1,\*</sup>

<sup>1</sup> Department of Chemistry, University of South Florida, 4202 E. Fowler Ave., CHE205, Tampa, Florida 33620, United States; bjbaker@usf.edu

<sup>2</sup> Department of Cell Biology, Microbiology, and Molecular Biology, University of South Florida, 4202 E. Fowler Ave., ISA2015, Tampa, Florida 33620, United States; ykee@usf.edu

<sup>3</sup> Department of Biology, University of Alabama at Birmingham, Birmingham, AL 35294, United States; amsler@uab.edu (C.D.A.); mcclinto@uab.edu (J.B.M.)

|                                                                                    | Page |
|------------------------------------------------------------------------------------|------|
| Figure S1: Anverene B <sup>1</sup> H NMR spectrum (500 MHz, CDCl <sub>3</sub> ).   | 2    |
| Figure S2: Anverene B <sup>13</sup> C NMR spectrum (125 MHz, CDCl <sub>3</sub> ).  | 2    |
| Figure S3: Anverene B COSY spectrum (500 MHz, CDCl <sub>3</sub> ).                 | 3    |
| Figure S4: Anverene B HSQC spectrum (500 MHz, CDCl <sub>3</sub> ).                 | 3    |
| Figure S5: Anverene B HMBC spectrum (500 MHz, CDCl <sub>3</sub> ).                 | 4    |
| Figure S6: Anverene B D HRNCIMS (-).                                               | 4    |
| Figure S7: Anverene C <sup>1</sup> H NMR spectrum (500 MHz, CDCl <sub>3</sub> ).   | 5    |
| Figure S8: Anverene C <sup>13</sup> C NMR spectrum (125 MHz, CDCl <sub>3</sub> ).  | 5    |
| Figure S9: Anverene C COSY spectrum (500 MHz, CDCl <sub>3</sub> ).                 | 6    |
| Figure S10: Anverene C HSQC spectrum (500 MHz, CDCl <sub>3</sub> ).                | 6    |
| Figure S11: Anverene C HMBC spectrum (500 MHz, CDCl <sub>3</sub> ).                | 7    |
| Figure S12: Anverene C 1D NOESY spectrum (600 MHz, CDCl <sub>3</sub> ).            | 7    |
| Figure S13: Anverene C HRNCIMS (-).                                                | 8    |
| Figure S14: Anverene D <sup>1</sup> H NMR spectrum (500 MHz, CDCl <sub>3</sub> ).  | 8    |
| Figure S15: Anverene D <sup>13</sup> C NMR spectrum (125 MHz, CDCl <sub>3</sub> ). | 9    |
| Figure S16: Anverene D COSY spectrum (500 MHz, CDCl <sub>3</sub> ).                | 9    |
| Figure S17: Anverene D HSQC spectrum (500 MHz, CDCl <sub>3</sub> ).                | 10   |
| Figure S18: Anverene D HMBC spectrum (500 MHz, CDCl <sub>3</sub> ).                | 10   |
| Figure S19: Anverene C 1D NOESY spectrum (600 MHz, CDCl <sub>3</sub> ).            | 11   |
| Figure S20: Anverene D HRNCIMS (-).                                                | 11   |
| Figure S21: Anverene E <sup>1</sup> H NMR spectrum (500 MHz, CDCl <sub>3</sub> ).  | 12   |
| Figure S22: Anverene E <sup>13</sup> C NMR spectrum (125 MHz, CDCl <sub>3</sub> ). | 12   |
| Figure S23: Anverene E COSY spectrum (500 MHz, CDCl <sub>3</sub> ).                | 13   |
| Figure S24: Anverene E HSQC spectrum (500 MHz, CDCl <sub>3</sub> ).                | 13   |
| Figure S25: Anverene E HMBC spectrum (500 MHz, CDCl <sub>3</sub> ).                | 14   |
| Figure S26: Anverene E NOESY spectrum (500 MHz, CDCl <sub>3</sub> ).               | 14   |
| Figure S27: Anverene E HRNCIMS (-).                                                | 15   |
| Figure S28: GC/MS identification of Anverene E in crude extract                    | 15   |

Table S1: Reported and predicted  $^{13}\text{C}$  NMR shifts of relevant compounds or theoretical alternate regio-isomers

16-18

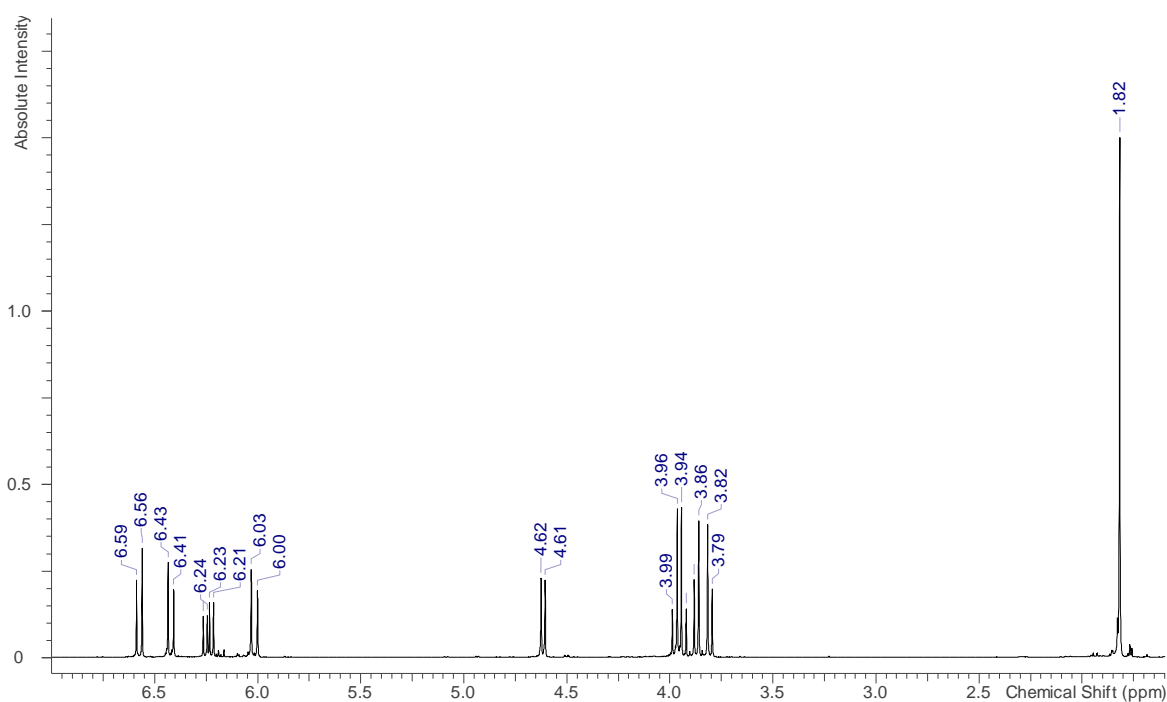Figure S1: Anverene B  $^1\text{H}$  NMR spectrum (500 MHz,  $\text{CDCl}_3$ ).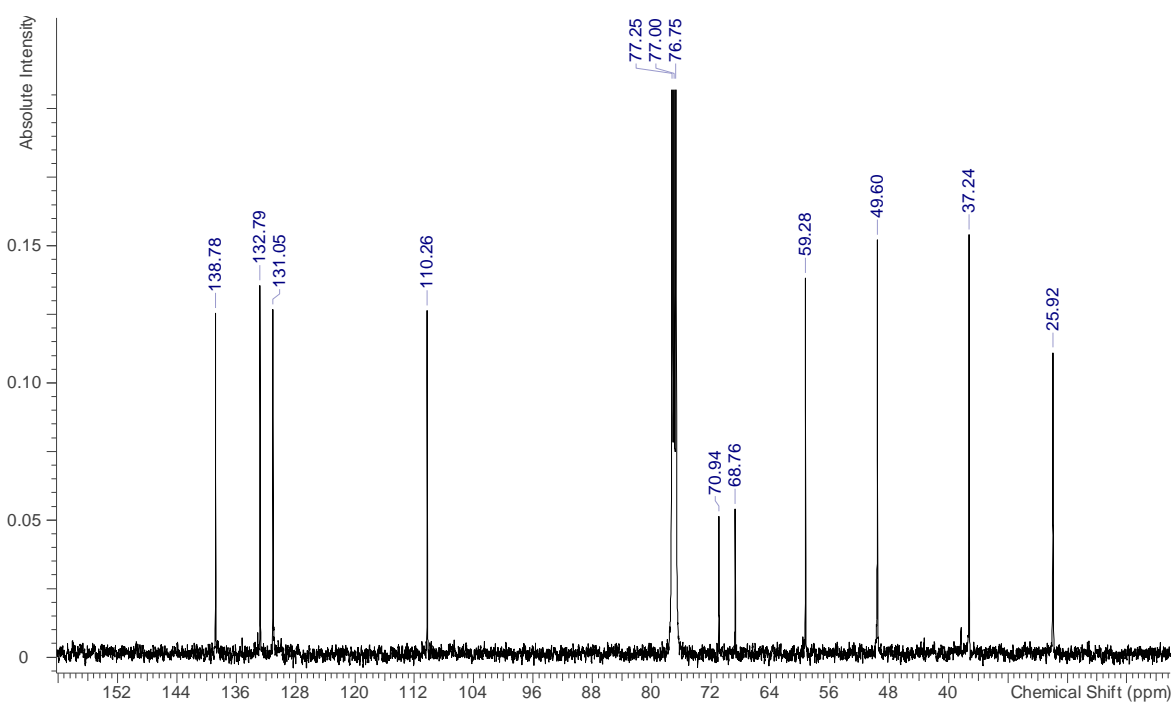Figure S2: Anverene B  $^{13}\text{C}$  NMR spectrum (125 MHz,  $\text{CDCl}_3$ ).

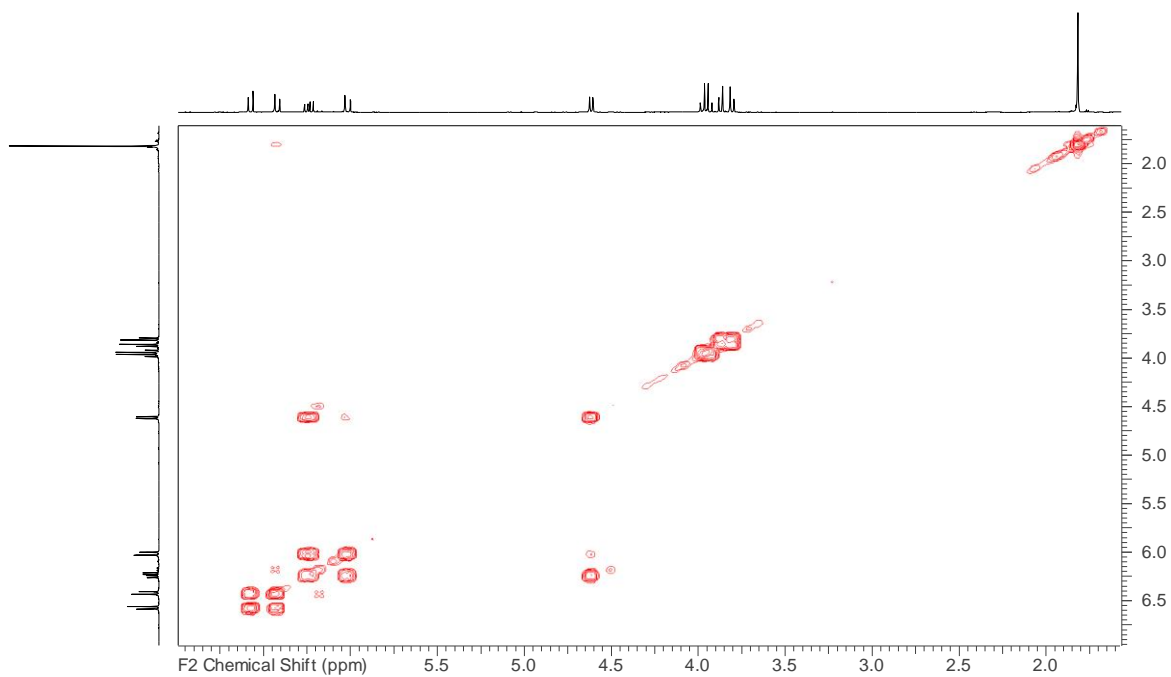

Figure S3: Anverene B COSY spectrum (500 MHz, CDCl<sub>3</sub>).

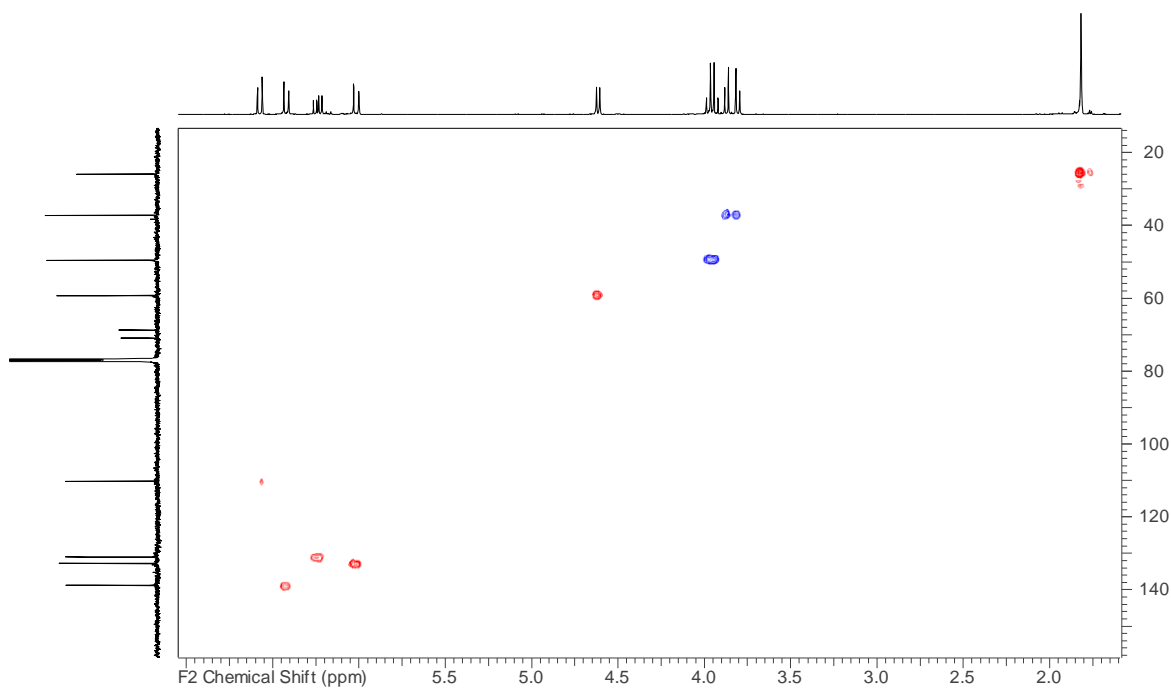

Figure S4: Anverene B HSQC spectrum (500 MHz, CDCl<sub>3</sub>).

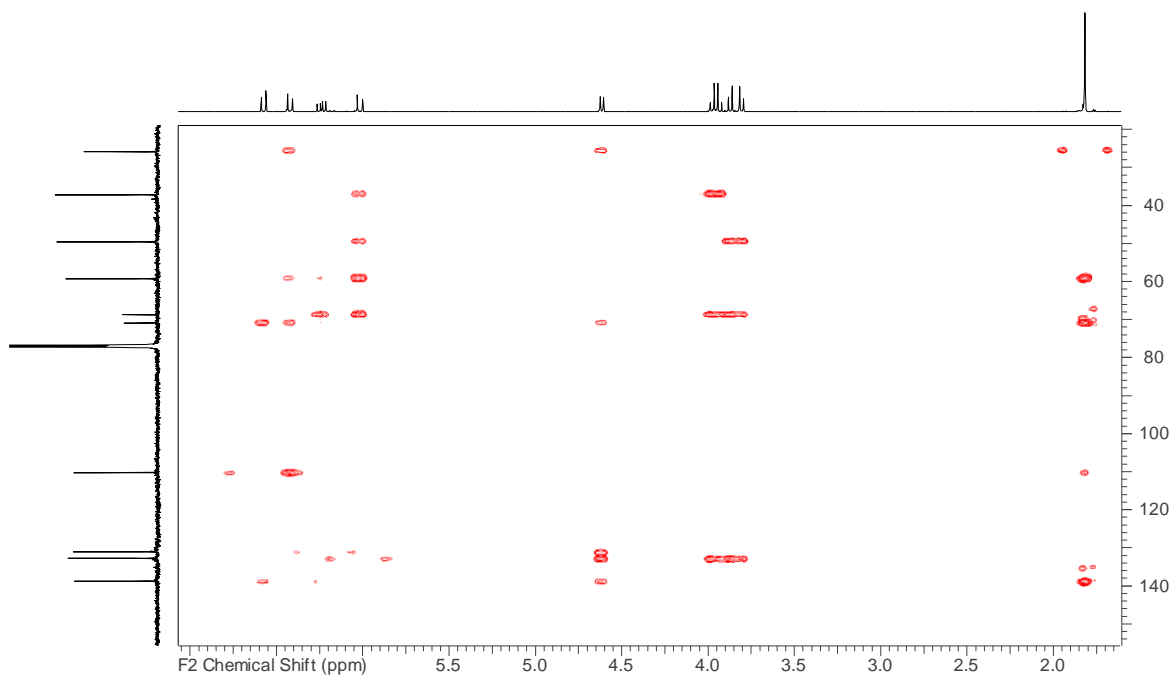

Figure S5: Anverene B HMBC spectrum (500 MHz, CDCl<sub>3</sub>).

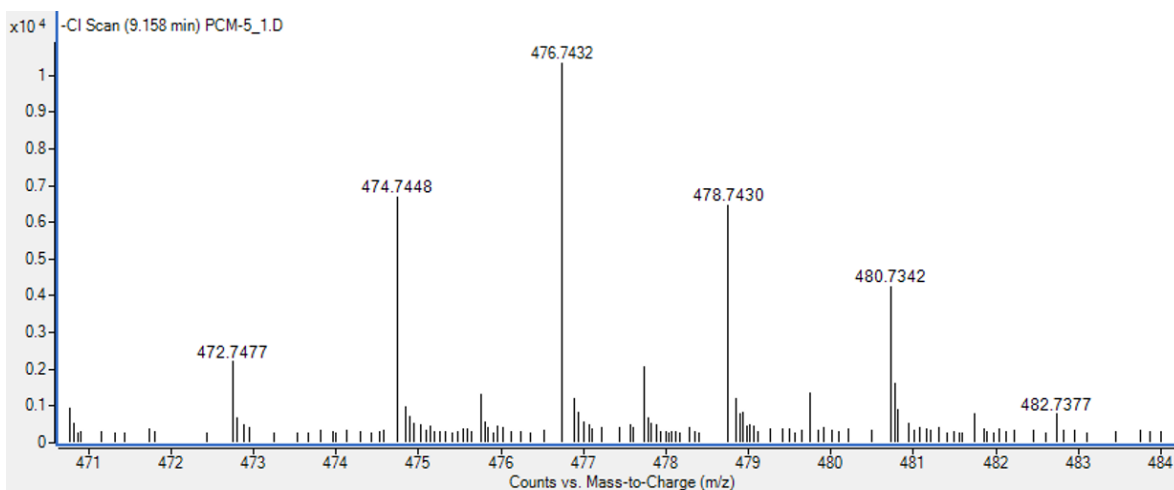

| Formula                                                         | Species            | Abundance (counts) | Ion Mass | Measured Mass | Error (ppm) | Error (mDa) |
|-----------------------------------------------------------------|--------------------|--------------------|----------|---------------|-------------|-------------|
| C <sub>10</sub> H <sub>12</sub> Br <sub>3</sub> Cl <sub>3</sub> | [M-H] <sup>-</sup> | 2231.10            | 472.7482 | 472.7477      | -1.058      | -0.5        |

Figure S6: Anverene B HRNCIMS (-).

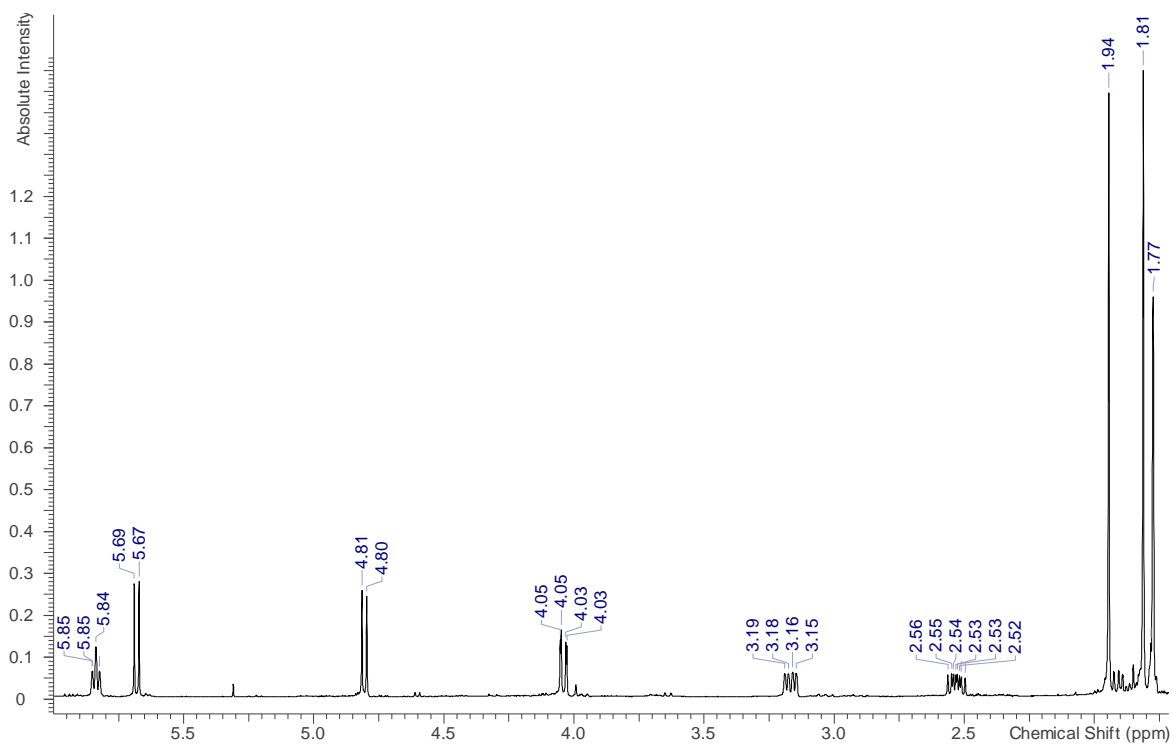Figure S7: Anverene C <sup>1</sup>H NMR spectrum (500 MHz, CDCl<sub>3</sub>).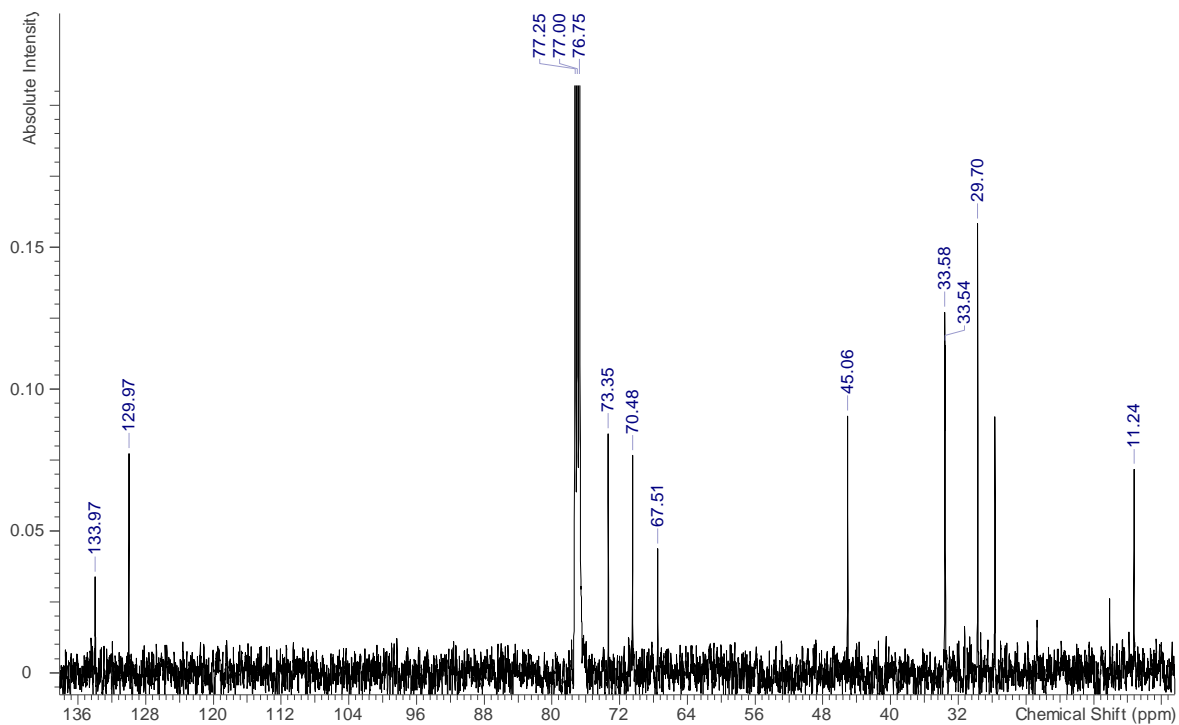Figure S8: Anverene C <sup>13</sup>C NMR spectrum (125 MHz, CDCl<sub>3</sub>).

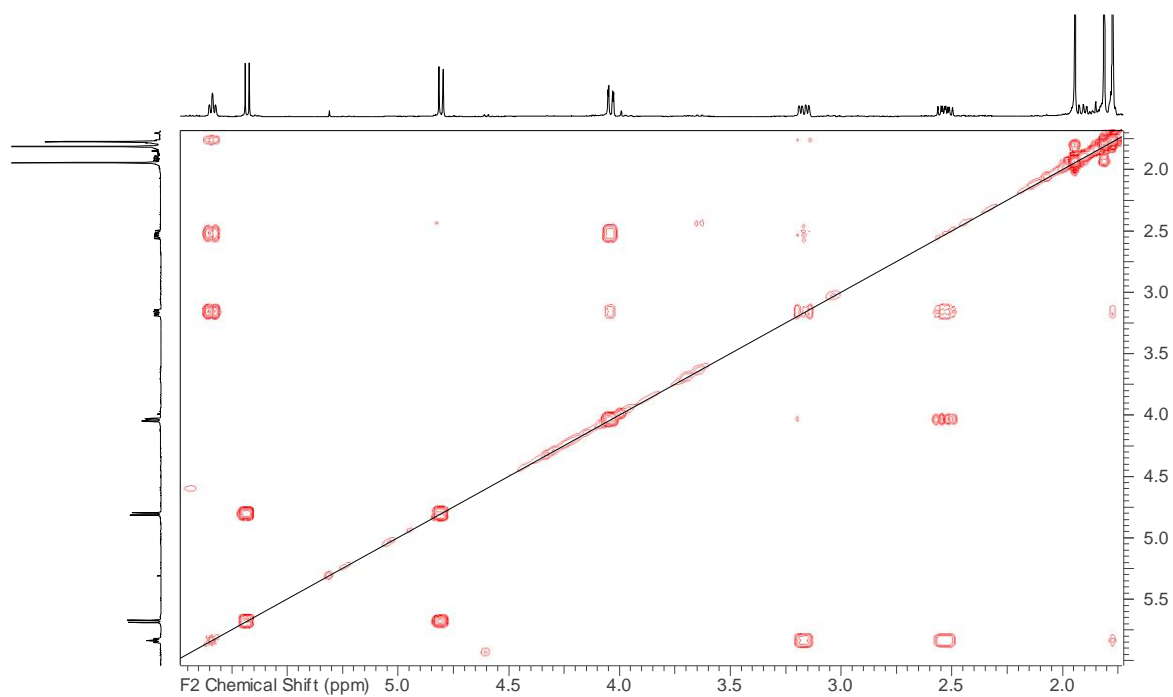Figure S9: Anverene C COSY spectrum (500 MHz, CDCl<sub>3</sub>).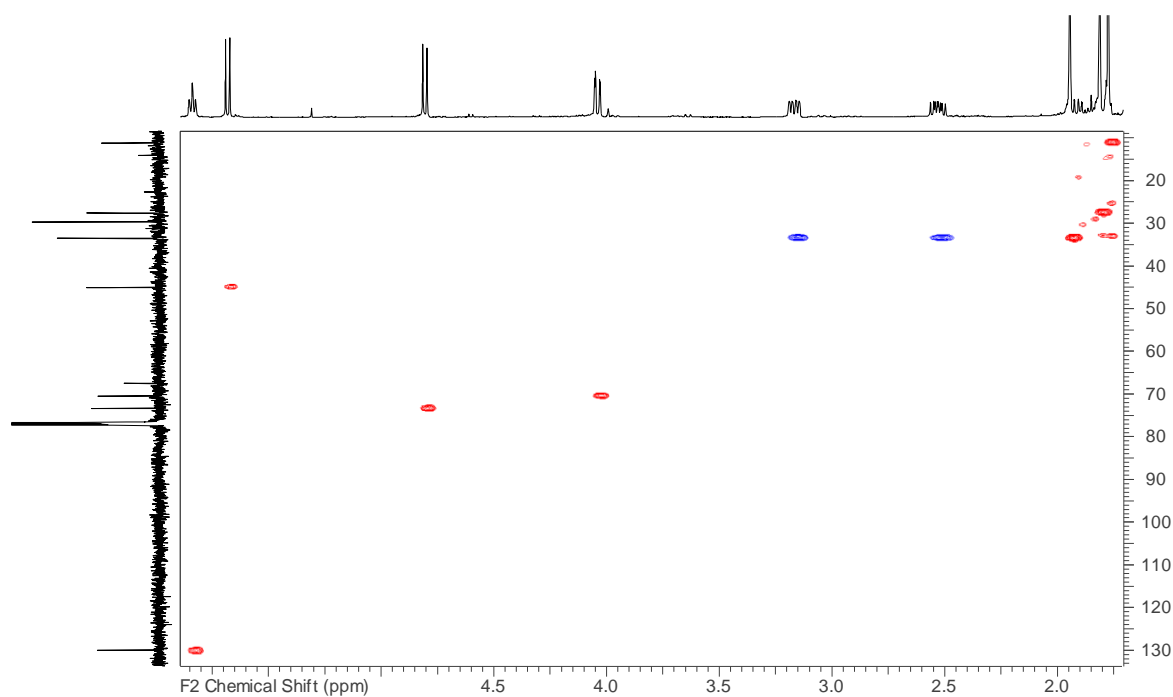Figure S10 Anverene C HSQC spectrum (500 MHz, CDCl<sub>3</sub>).

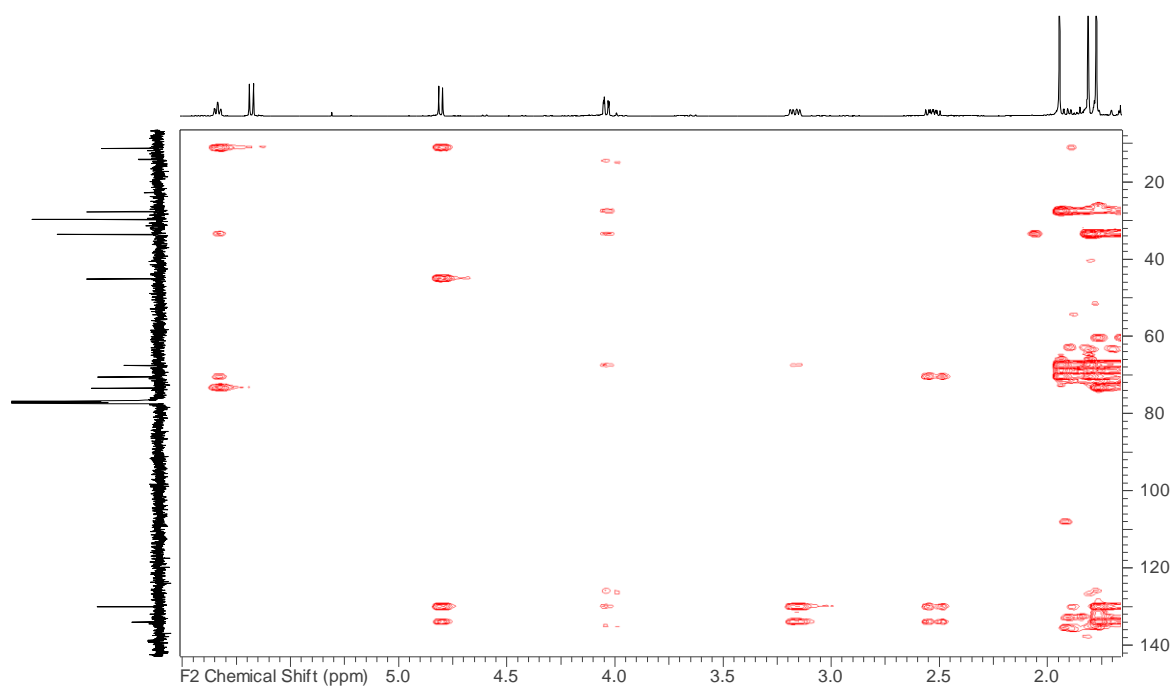

Figure S11: Anverene C HMBC spectrum (500 MHz, CDCl<sub>3</sub>).

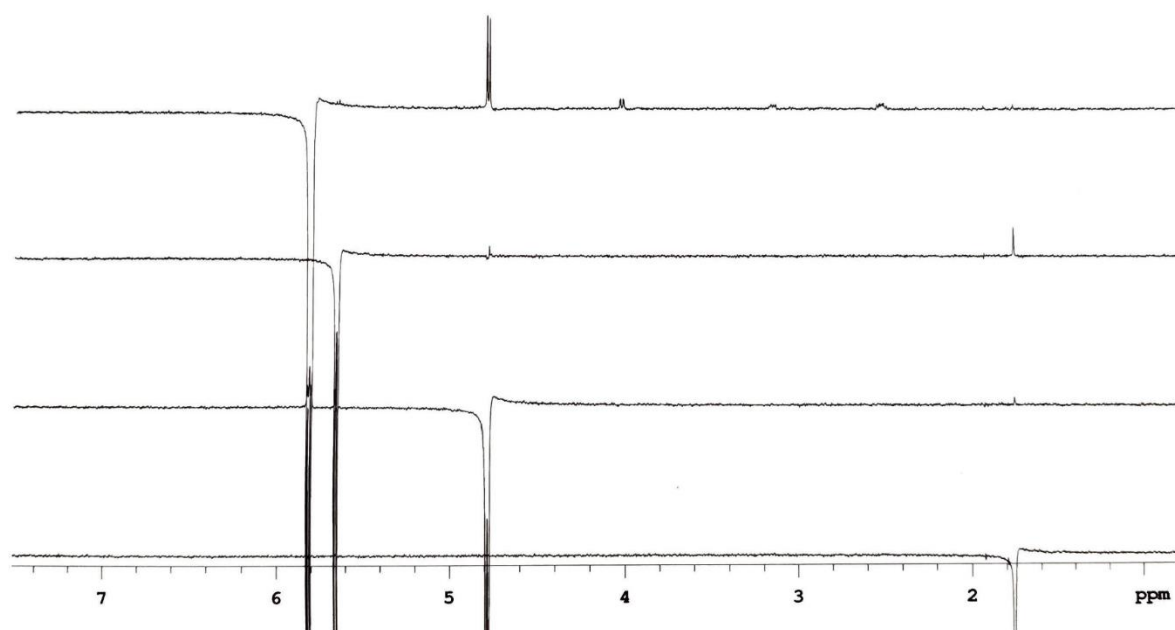

Figure S12: Anverene C 1D NOESY spectrum (600 MHz, CDCl<sub>3</sub>).

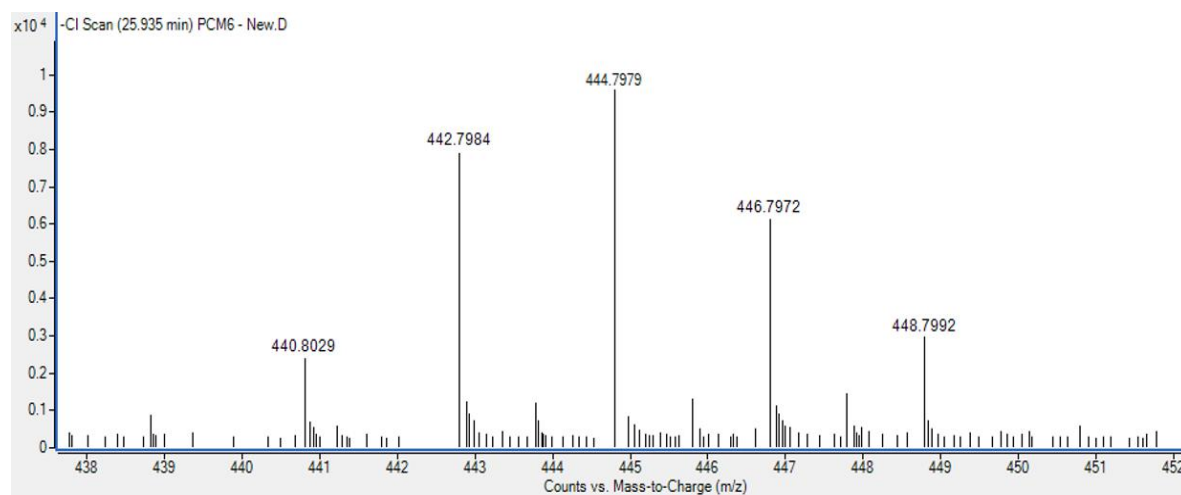

| Formula                                                         | Species            | Abundance (counts) | Ion Mass | Measured Mass | Error (ppm) | Error (mDa) |
|-----------------------------------------------------------------|--------------------|--------------------|----------|---------------|-------------|-------------|
| C <sub>10</sub> H <sub>15</sub> Br <sub>3</sub> Cl <sub>2</sub> | [M-H] <sup>-</sup> | 2403.53            | 440.8028 | 440.8029      | 0.227       | 0.1         |

Figure S13: Anverene C HRNCIMS (-).

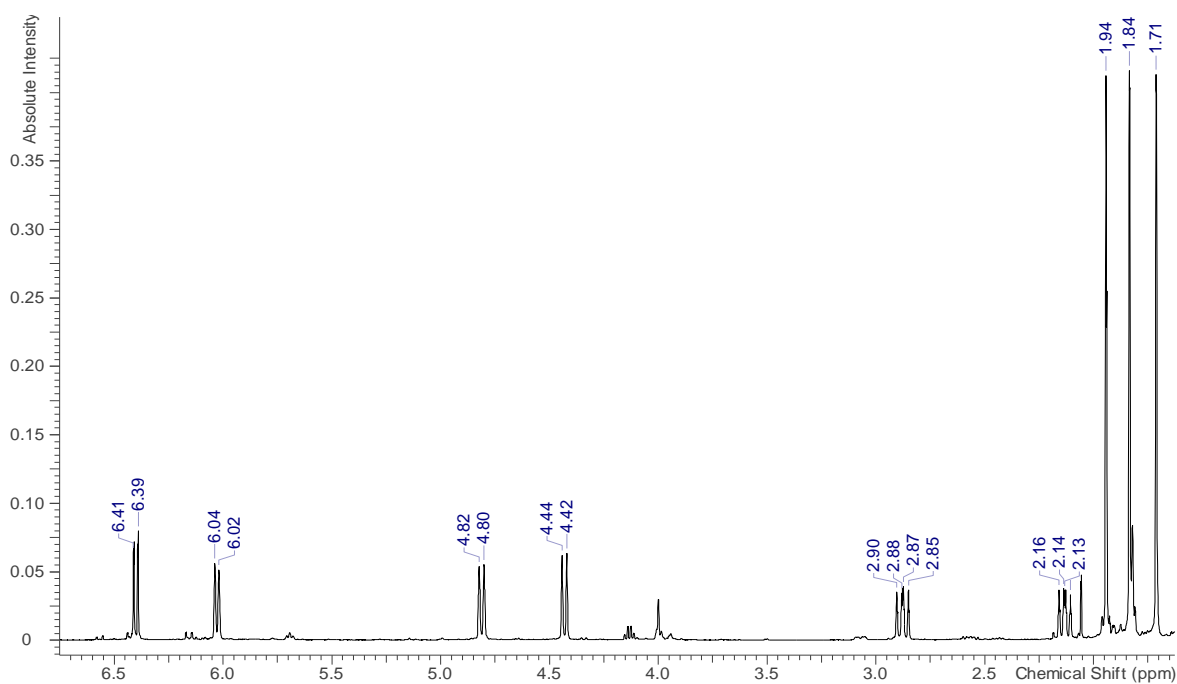Figure S14: Anverene D <sup>1</sup>H NMR spectrum (500 MHz, CDCl<sub>3</sub>).



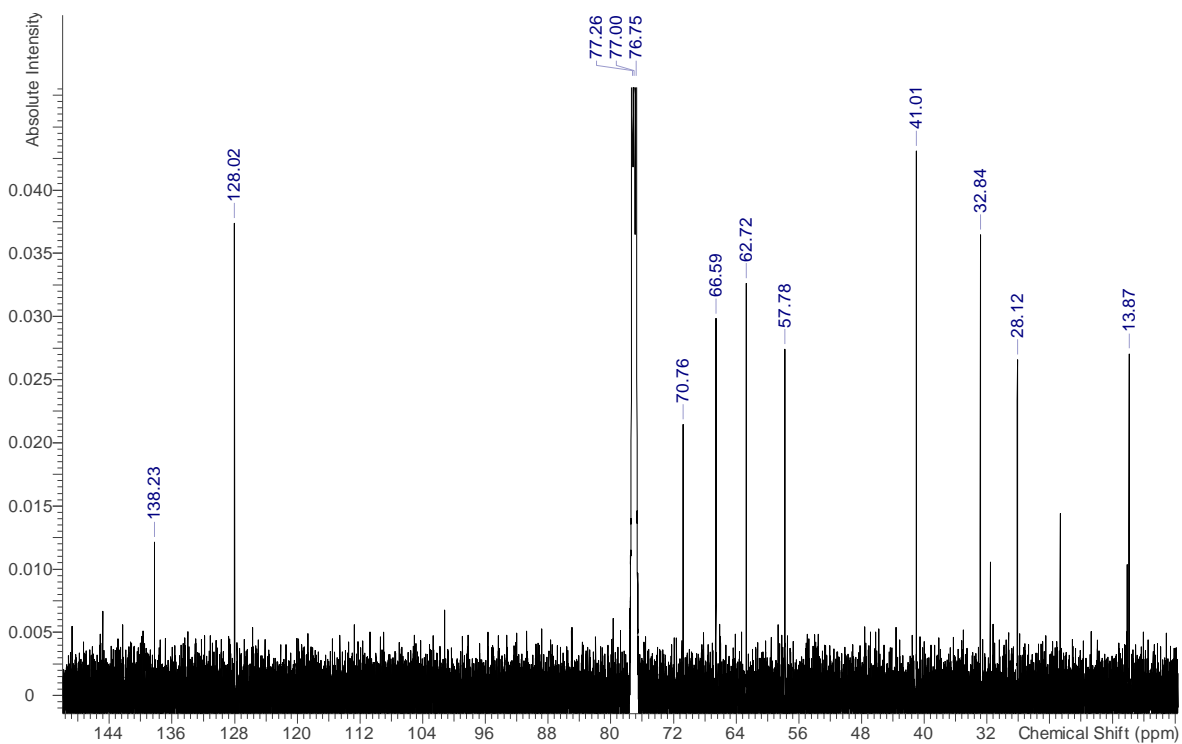Figure S15: Anverene D  $^{13}\text{C}$  NMR spectrum (125 MHz,  $\text{CDCl}_3$ ).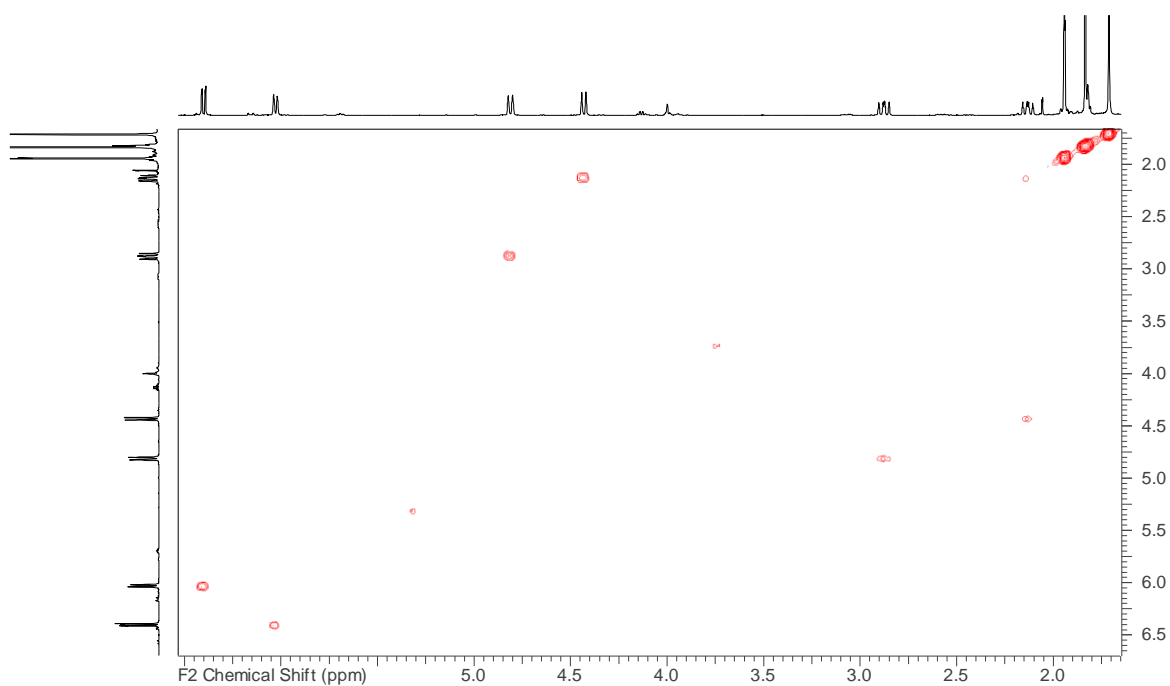Figure S16: Anverene D COSY spectrum (500 MHz,  $\text{CDCl}_3$ ).

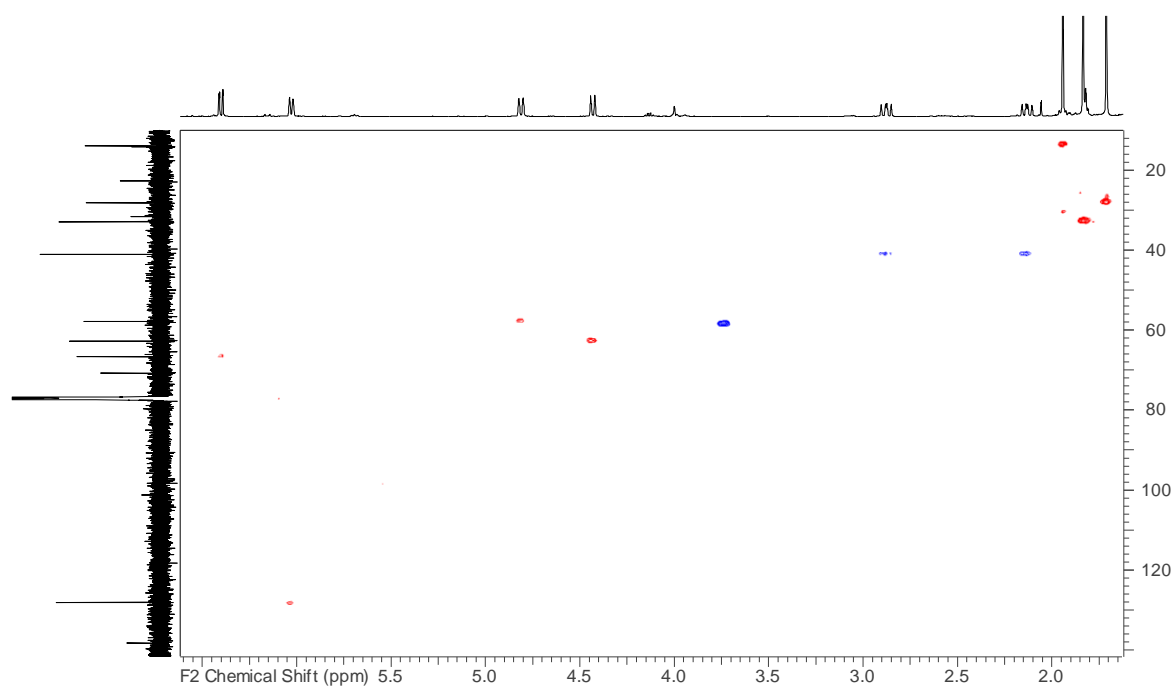Figure S17: Anverene D HSQC spectrum (500 MHz, CDCl<sub>3</sub>).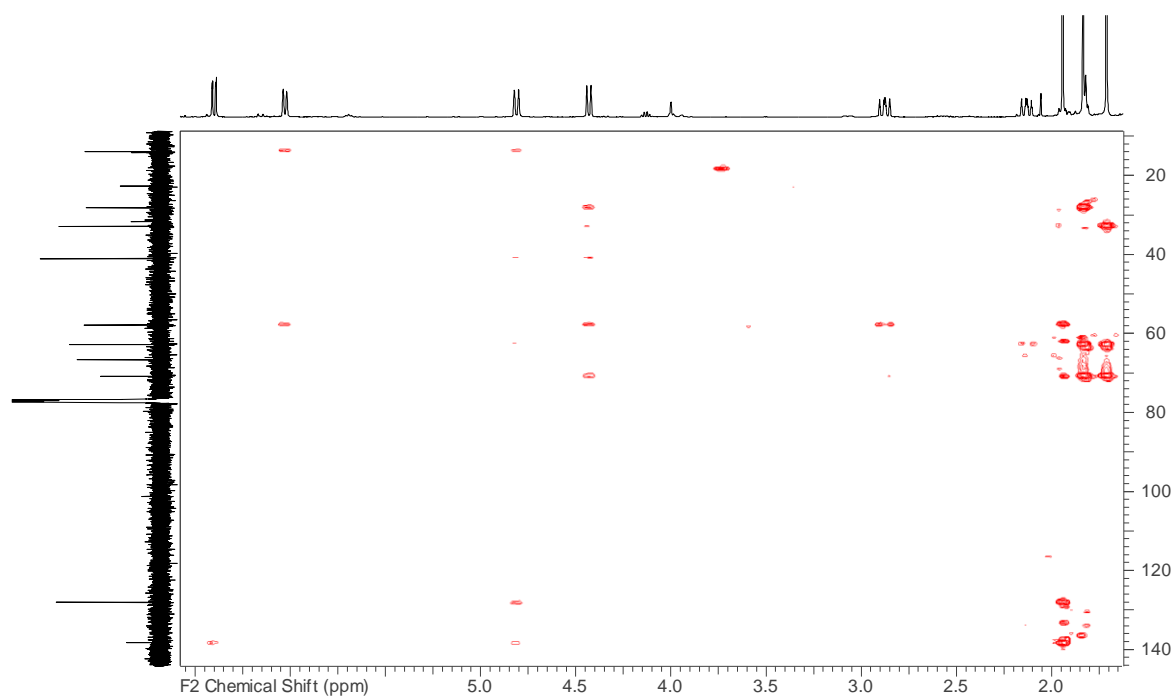Figure S18: Anverene D HMBC spectrum (500 MHz, CDCl<sub>3</sub>).

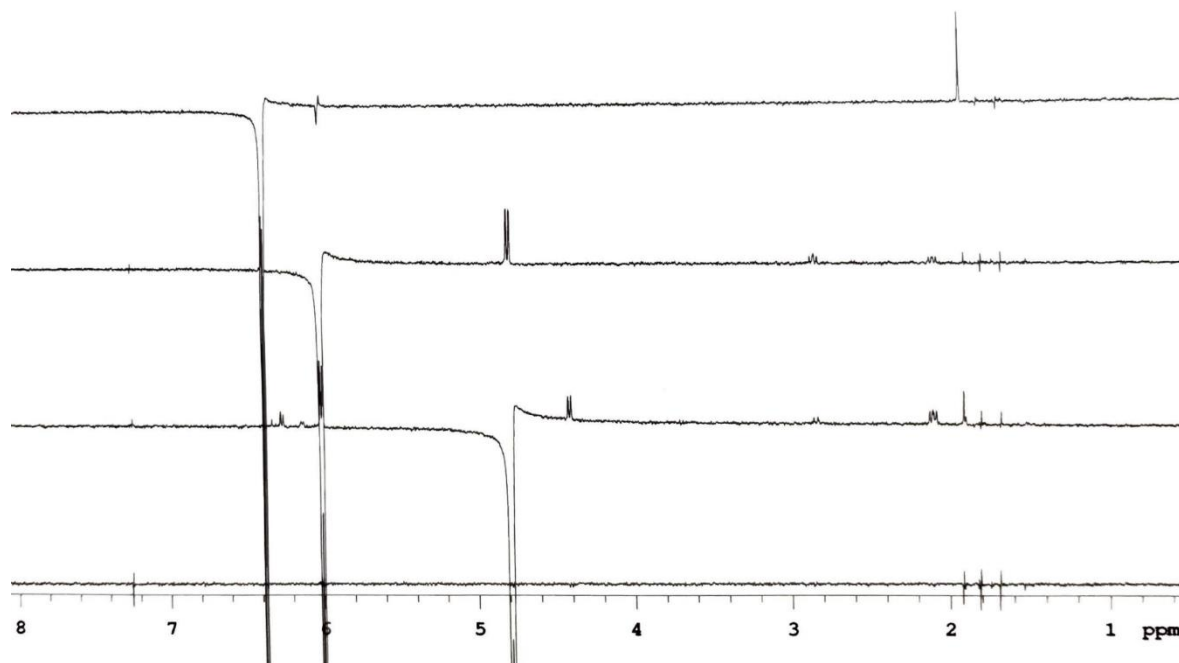

Figure S19: Anverene C 1D NOESY spectrum (600 MHz, CDCl<sub>3</sub>).

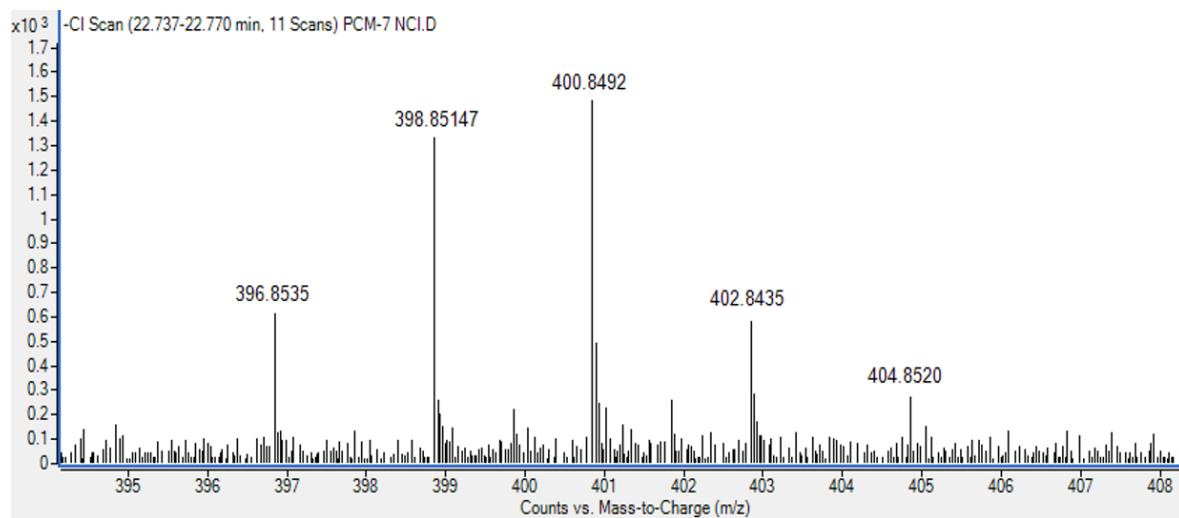

| Formula                                                         | Species            | Abundance (counts) | Ion Mass | Measured Mass | Error (ppm) | Error (mDa) |
|-----------------------------------------------------------------|--------------------|--------------------|----------|---------------|-------------|-------------|
| C <sub>10</sub> H <sub>15</sub> Br <sub>2</sub> Cl <sub>3</sub> | [M-H] <sup>-</sup> | 610.34             | 396.8533 | 396.8535      | 0.504       | 0.2         |

Figure S20: Anverene D HRNCIMS (-).

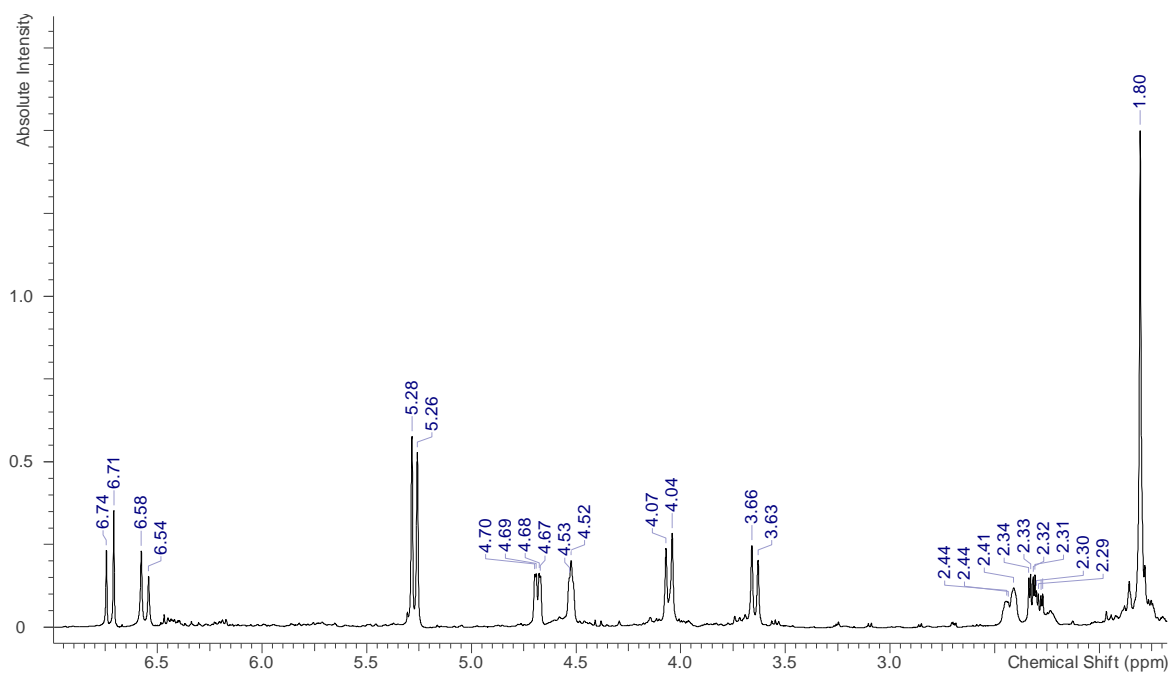Figure S21: Anverene E <sup>1</sup>H NMR spectrum (500 MHz, CDCl<sub>3</sub>).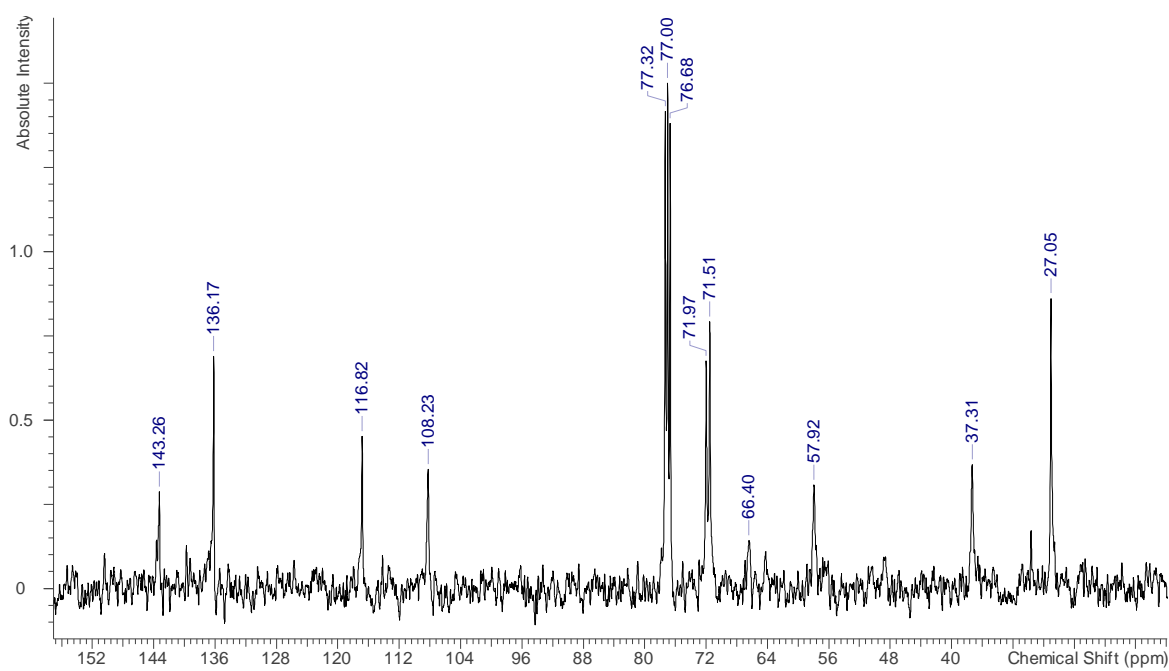Figure S22: Anverene E <sup>13</sup>C NMR spectrum (125 MHz, CDCl<sub>3</sub>).

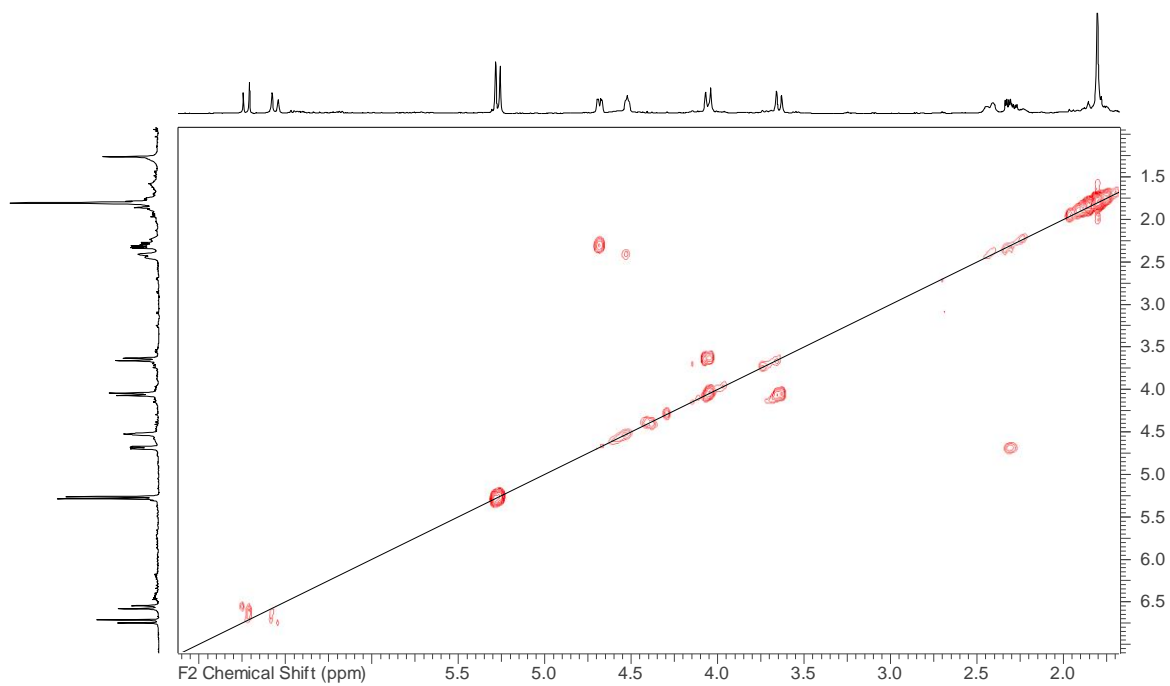Figure S23: Anverene E COSY spectrum (500 MHz, CDCl<sub>3</sub>).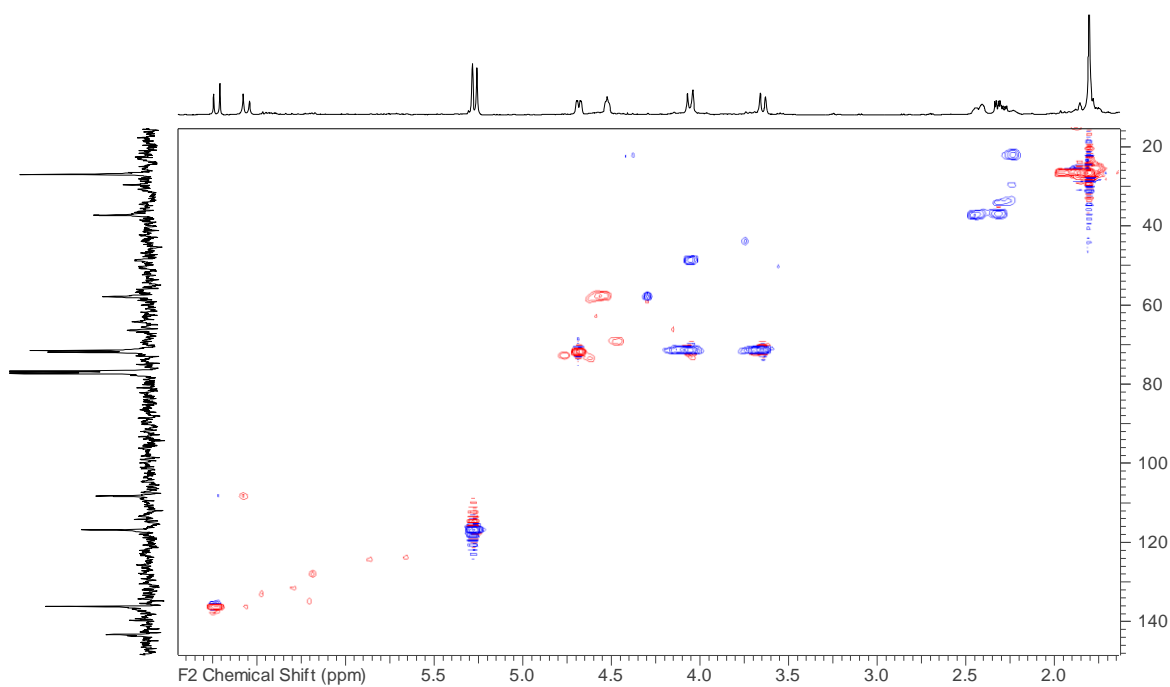Figure S24: Anverene E HSQC spectrum (500 MHz, CDCl<sub>3</sub>).

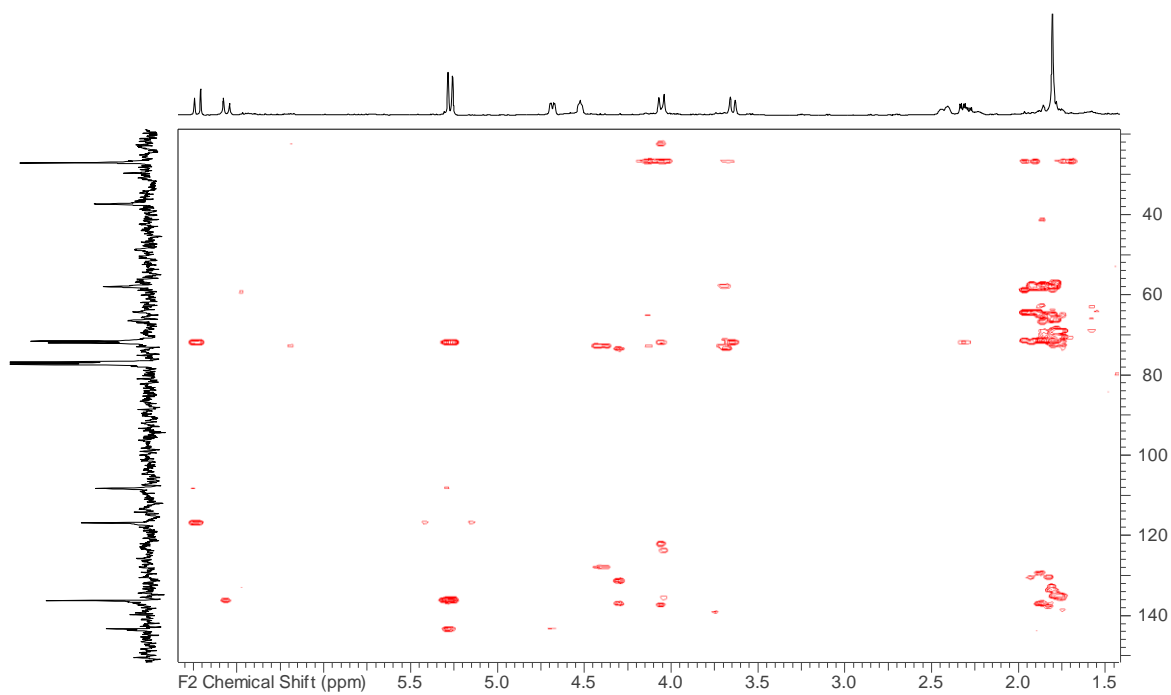Figure S25: Anverene E HMBC spectrum (500 MHz, CDCl<sub>3</sub>).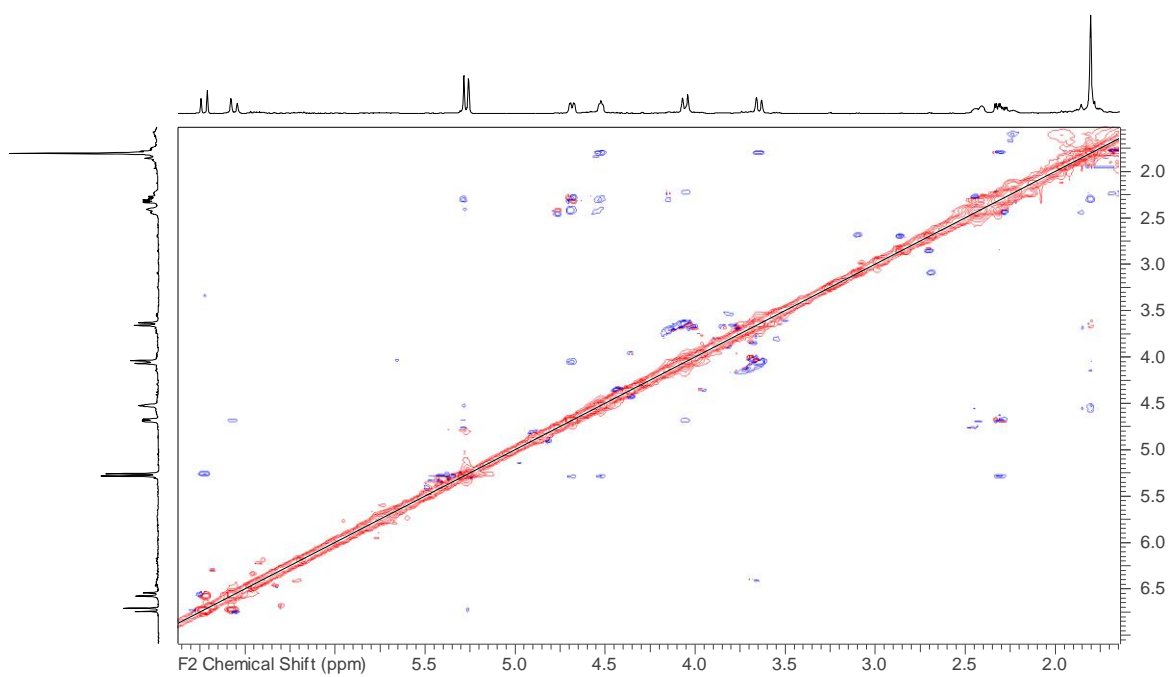Figure S26: Anverene E NOESY spectrum (500 MHz, CDCl<sub>3</sub>).

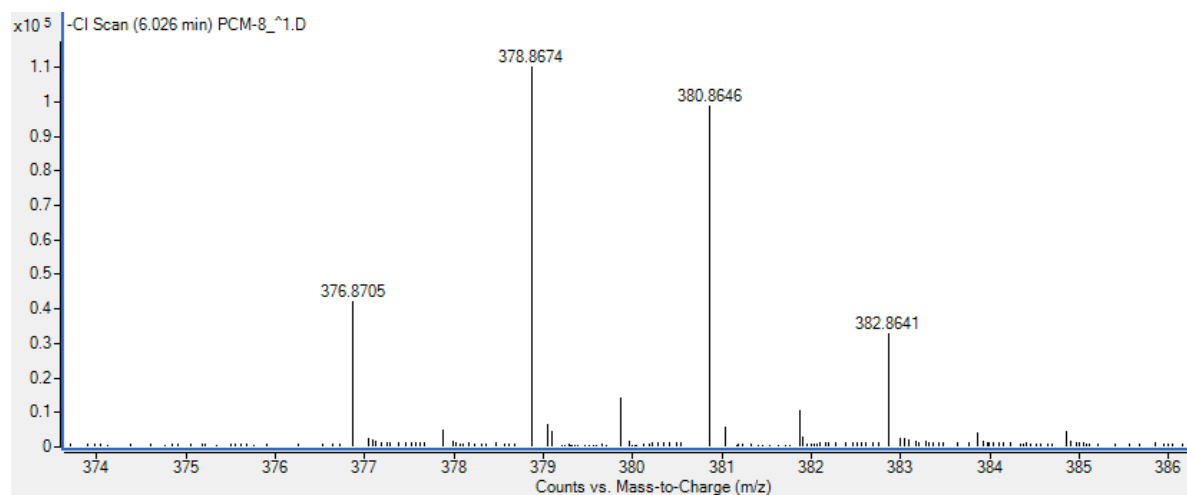

| Formula                                             | Species             | Abundance (counts) | Ion Mass | Measured Mass | Error (ppm) | Error (mDa) |
|-----------------------------------------------------|---------------------|--------------------|----------|---------------|-------------|-------------|
| C <sub>10</sub> H <sub>13</sub> BrCl <sub>2</sub> O | [M+Br] <sup>-</sup> | 42070.74           | 376.8716 | 376.8705      | -2.918      | -1.1        |

Figure S27: Anverene E HRNCIMS (-).

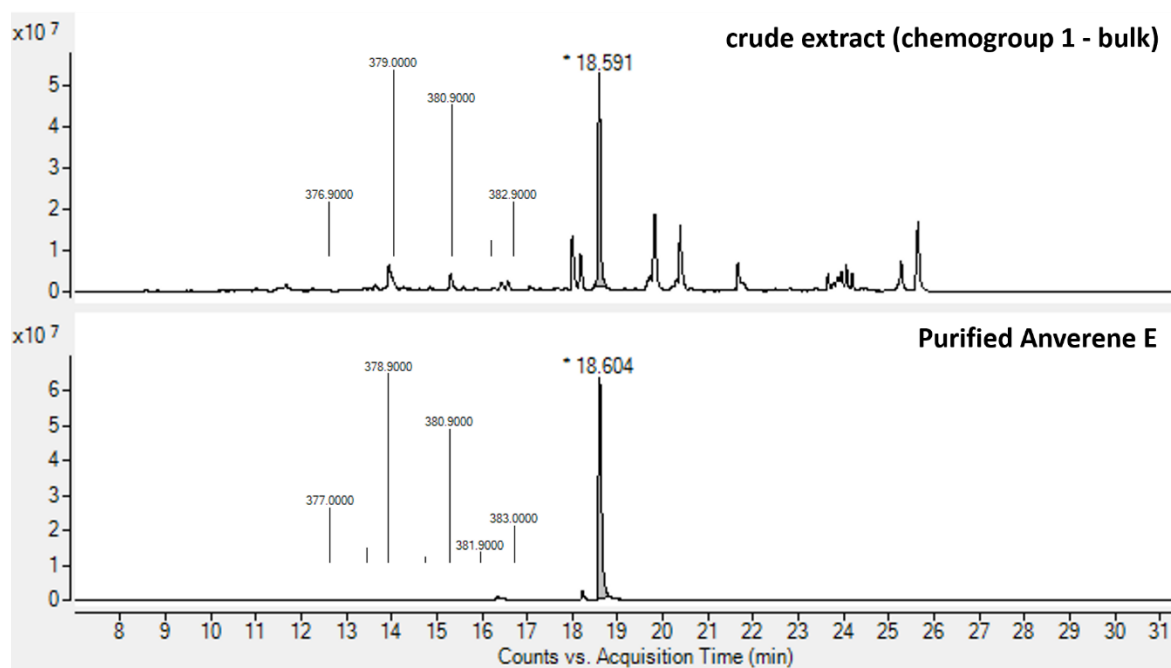

Figure S28: GC/MS identification of Anverene E in crude extract

Table S1: Reported and predicted  $^{13}\text{C}$  NMR shifts of relevant compounds or possible regio-isomers

| Compound                                     | Reported $^{13}\text{C}$ Shifts                                                     | ChemDraw Chem NMR $^{13}\text{C}$ Estimations                                        |
|----------------------------------------------|-------------------------------------------------------------------------------------|--------------------------------------------------------------------------------------|
| (1)<br>Anverene                              | 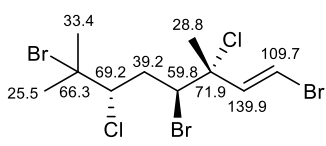   |    |
| (2)                                          |    |    |
| (3)<br>Oregonene A                           |    |    |
| (4)                                          |   |   |
| (5)                                          |  |  |
| (6)<br>Anverene B                            |  |  |
| Theoretical<br>Regio-Isomer<br>Of Anverene B |                                                                                     |  |
| Theoretical<br>Regio-Isomer<br>Of Anverene B |                                                                                     |  |
| Theoretical<br>Regio-Isomer<br>Of Anverene B |                                                                                     |  |



|                                              |  |  |
|----------------------------------------------|--|--|
| Theoretical<br>Regio-Isomer<br>Of Anverene B |  |  |
| Theoretical<br>Regio-Isomer<br>Of Anverene B |  |  |
| (7)<br>Anverene C                            |  |  |
| (10)                                         |  |  |
| Theoretical<br>Regio-Isomer<br>Of Anverene C |  |  |
| Theoretical<br>Regio-Isomer<br>Of Anverene C |  |  |
| Theoretical<br>Regio-Isomer<br>Of Anverene C |  |  |
| Theoretical<br>Regio-Isomer<br>Of Anverene C |  |  |
| Theoretical<br>Regio-Isomer<br>Of Anverene C |  |  |
| (8)<br>Anverene D                            |  |  |

|                                              |  |  |
|----------------------------------------------|--|--|
| (11)<br>Plocoralide B                        |  |  |
| Theoretical<br>Regio-Isomer<br>Of Anverene D |  |  |
| Theoretical<br>Regio-Isomer<br>Of Anverene D |  |  |
| Theoretical<br>Regio-Isomer<br>Of Anverene D |  |  |
| Theoretical<br>Regio-Isomer<br>Of Anverene D |  |  |
| Theoretical<br>Regio-Isomer<br>Of Anverene D |  |  |
| (9)<br>Anverene E                            |  |  |
| Theoretical<br>Regio-Isomer<br>Of Anverene E |  |  |
| Theoretical<br>Regio-Isomer<br>Of Anverene E |  |  |
